# Supplementary material for: On the use of mixtures of organotin species for catalytic enantioselective ketone allylation—a detective story
Source: Royal Society of Chemistry journal article supplement (doi:10.1039/b313384b), 2004-01-01
Supplement: b313384b.doc [file b313384b.doc]

# Supplementary data

On the Use of Mixtures of Organotin Species for Catalytic Enantioselective Ketone Allylation – A Detective Story

Anthony Cunningham, Vijaya Mokal-Parekh, Claire Wilson and Simon Woodward*

School of Chemistry, The University of Nottingham, University Park, Nottingham NG7 2RD, United Kingdom. Fax: +44(115)9513564; Tel: +44(115)9513541; E-mail: simon.woodward@nottingham.ac.uk

Experimental

*General.* Procedures involving air or moisture sensitive reagents or intermediates were performed under atmospheres of argon using standard Schlenk techniques. Reaction solvents were dried and distilled immediately prior use from appropriate agents. Diethyl ether was distilled from sodium-benzophenone. Methanol and dichloromethane were distilled from CaH2. Toluene was distilled from sodium. Column chromatography was performed using Fluorochem (35-70 micron) silica gel and TLC analysis using Merck Kieselgel 60 F254+366. Infrared spectra were recorded using a Perkin-Elmer 882 or a Nicolet Avatar 360 FT-IR infrared spectrophotometer. 1H and 13C NMR spectra were recorded on Bruker (AM400, AV400 and DRX500) spectrometers at ambient temperature unless otherwise noted. Tetramethylsilane was used as standard and J values are given in Hz. 119Sn NMR spectra were recorded on a Bruker AV400 spectrometer, using SnMe4 as standard. Mass spectra were obtained on a Finnigan-MAT 1020 (electron impact ionisation, EI), Finnigan QMS (electrospray ionisation) and 70E VG (fast atom bombardment, FAB) machines. GCMS studies were conducted on a Thermo Finnigan Polaris Q machine with a Restek RTX-5 column ramped from 40-250 oC. Specific rotations were measured using a Jasco DIP370 Digital polarimeter at ambient conditions and are given in units of 10-1 deg cm2 g-1; c is in g/100 mL of solvent. Analysis by GC was performed on a Varian 3380 gas chromatograph using the columns cited in Table 5. Analysis by HPLC was performed using a Hewlett Packard 1100LC machine (see Table 5 for details). Tetraallyltin and butyltriallyltin was prepared by reaction of allylmagnesium chloride with SnCl4 as described in the literature (Ref. 14 in paper) excepting that various magnesium sources were used.

Preparation of *tert*-homoallylic alcohols

All compounds were prepared by methods analogous to those described in the paper. All have been described in the literature previously.1-8

3-Phenyl-hex-5-en-3-ol (3b)5

Prepared by the allylation of propiophenone. Yield 19% (4% ee); H (400 MHz, CDCl3) 0.78 (3 H, t, J 7.4, Me), 1.80-1.91 (2 H, m, CH2), 2.04 (1 H, br s, OH), 2.51 (1 H, ddt, J 13.8, 8.6, 0.8, CH2), 2.74 (1 H, ddt, J 13.8, 6.1, 1.4, CH2), 5.09-5.17 (2 H, m, =CH2), 5.59 (1 H, dddd, 14.8, 10.1, 8.6, 6.1, =CH), 7.24 (1 H, tt, J 7.2, 1.4, Ar), 7.32-7.37 (2 H, m, Ar), 7.39-7.42 (2 H, m, Ar); C (100.6 MHz, CDCl3) 7.9, 35.3, 47.0, 76.1, 119.6, 125.5 (2 C), 126.5, 128.1 (2 C), 133.7, 145.8; max (thin film)/cm-13374br, 3060m, 2971s, 2936s, 1683m, 1494m, 1446s; m/z (EI) 163 (2%), 158 (4), 135 (95), 105 (100).

1,2,3,4-Tetrahydro-1-(2-propenyl)-naphthalen-1-ol (3c)1,3,4

Prepared by the allylation of 1-tetralone. Yield 9% (<2% ee); H (400 MHz, CDCl3) 1.80-1.91 (3 H, m, c(CH2)3), 1.93 (1 H, s, OH), 2.03-2.08 (1 H, m, c(CH2)), 2.63 (2 H, dt, J 7.3, 1.1, CH2allyl), 2.72-2.88 (2 H, m, c(CH2)2), 5.12-5.14 (1 H, m, =CH2), 5.15-5.18 (1 H, m, =CH2), 5.78-5.88 (1 H, m, =CH), 7.08-7.10 (1 H, m, Ar), 7.18 (1 H, td, J 7.3, 1.5, Ar), 7.21-7.25 (1 H, m, Ar), 7.57 (1 H, dd, J 7.8, 1.6, Ar); C (100.6 MHz, CDCl3) 19.8, 29.8, 36.2, 47.1, 72.0, 118.7, 126.3, 126.4, 127.2, 129.0, 134.1, 136.9, 142.0; max (thin film)/cm-1 3403br, 3071m, 3017w, 2935s, 1638m, 1488m, 1448s; m/z (EI) 170 (27%), 147 (100).

(*S*)-(-)-2-(2-Naphthyl)-pent-4-en-2-ol (3d) 1,2

Prepared by the allylation of
2’-acetonaphthone. Yield >98% (87% ee); H (400 MHz, CDCl3) 1.66 (3 H, s, Me), 2.23 (1 H, s, OH), 2.61 (1 H, dd, J 13.8, 8.4, plus unresolved couplings to =CH2, CH2), 2.82 (1 H, dd, J 13.8, 6.4, plus unresolved couplings to =CH2, CH2), 5.14 (1 H, d, J 10.1, plus unresolved gem coupling and couplings to CH2, =CH2), 5.18 (1 H, d, J 14.7, plus unresolved gem coupling and couplings to CH2, =CH2), 5.64 (1 H, dddd, J 14.7, 10.1, 8.4, 6.4, =CH), 7.45-7.52 (2 H, m, Ar), 7.56 (1 H, dd, J 8.6, 1.9, Ar), 7.82-7.88 (3 H, m, Ar), 7.94 (1 H, d, J 1.7, plus unresolved long range couplings, H-C(1)); C (100.6 MHz, CDCl3) 30.0, 48.4, 73.9, 119.7, 123.3, 123.6, 125.8, 126.1, 127.5, 128.0, 128.2, 132.3, 133.3, 133.7, 145.1; max (thin film)/cm-13426br, 3057m, 2975s, 2929m, 1638m, 1600m, 1505m, 1375m, 1131m; m/z (EI) 212 (M+, 3%), 194 (76), 179 (100).

(*S*)-(-)-2-(4-Nitrophenyl)-pent-4-en-2-ol (3e)1,5

Prepared by the allylation of
4-nitroacetophenone. Yield >98% (86% ee); H (400 MHz, CDCl3) 1.58 (3 H, s, Me), 2.22 (1 H, s, OH), 2.54 (1 H, dd, J 13.8, 8.1, plus unresolved couplings to =CH2, CH2), 2.68 (1 H, dd, J 13.8, 6.6, plus unresolved couplings to =CH2, CH2), 5.13-5.16 (1 H, m, =CH2), 5.17-5.18 (1 H, m, =CH2), 5.59 (1 H, dddd, J 16.3, 10.8, 8.1, 6.6, =CH), 7.62 (2 H, dd, J 9.0, 2.0, Ar), 8.19 (2 H, dd, J 9.0, 2.0, Ar); C (100.6 MHz, CDCl3) 29.9, 48.3, 73.7, 120.6, 123.5 (2 C), 126.0 (2 C), 132.5, 146.8, 155.1; max (diffuse reflectance)/cm-1 2955w, 1623w, 1347m; m/z (EI) 166 (80%), 49 (100).

(*S*)-(-)-2-(4-Bromophenyl)-pent-4-en-2-ol (3f)2,4

Prepared by the allylation of
4-bromoacetophenone. Yield 97% (86% ee); H (400 MHz, CDCl3) 1.53 (3 H, s, Me), 2.12 (1 H, s, OH), 2.49 (1 H, ddt, J 13.7, 8.2, 0.8, CH2), 2.64 (1 H, ddt, J 13.7, 6.6, 1.0, CH2), 5.10-5.13 (1 H, m, =CH2), 5.15-5.18 (1 H, m, =CH2), 5.60 (1 H, dddd, J 14.7, 9.7, 8.2, 6.6, =CH), 7.31 (2 H, dd, J 8.7, 2.0, Ar), 7.46 (2 H, dd, J 8.7, 2.0, Ar); C (100.6 MHz, CDCl3) 29.9, 48.4, 73.5, 119.9, 120.6, 126.8 (2 C), 131.3 (2 C), 133.2, 146.8; m/z (EI) 222 (4%), 199 (100).

(*S*)-(-)-2-(3-Bromophenyl)-pent-4-en-2-ol (3g)6

Prepared by the allylation of
3-bromoacetophenone **147e**; yield >98% (88% ee); H (400 MHz, CDCl3) 1.54 (3 H, s, Me), 2.02 (1 H, s, OH), 2.50 (1 H, ddt J 13.8, 8.1, 0.9, CH2), 2.65 (1 H, ddt, J 13.8, 6.6, 1.0, CH2), 5.10-5.15 (1 H, m, =CH2), 5.15-5.16 (1 H, m, =CH2), 5.64 (1 H, dddd, J 15.8, 11.4, 8.1, 6.6, =CH), 7.21 (1 H, t, J 7.9, H-C(5)), 7.36 (1 H, ddd, J 7.9, 1.9, 1.1, H-C(4 or 6)), overlapped by 7.37 (1 H, ddd, J 7.9, 1.9, 1.1, H-C(4 or 6)), 7.63 (1 H, t, J 1.9, H-C(2)); C (100.6 MHz, CDCl3) 29.9, 48.5, 73.4, 119.9, 122.7, 123.6, 128.4, 129.8 (2 C), 133.3, 150.4; max (thin film)/cm-1 3408br, 3074m, 2976s, 2929m,1640m, 1594m, 1566s, 1415s, 1074m; m/z (EI) 222 (3%), 199 (100).

2-(2-Bromophenyl)-pent-4-en-2-ol (3h)6,7

Prepared by the allylation of
2-bromoacetophenone. Yield 21% (45% ee); H (400 MHz, CDCl3) 1.72 (3 H, s, Me), 2.65 (1 H, dd, J 14.0, 8.3, plus unresolved couplings to =CH2, CH2), overlapped by 2.65 (1 H, s, OH), 3.27 (1 H, ddt, J 14.0, 6.4, 1.2, CH2), 5.09 (1 H, ddt, J 10.1, 2.2, 0.8, =CH2), 5.14 (1 H, ddt, J 17.0, 2.2, 1.2, =CH2), 5.65 (1 H, dddd, 17.0, 10.1, 8.3, 6.4, =CH), 7.09 (1 H, td, J 7.7, 1.8, H-C(4 or 5)), 7.29 (1 H, td, J 7.3, 1.3, H-C(4 or 5)), 7.58 (1 H, dd, J 7.9, 1.4, H-C(3 or 6)), 7.70 (1 H, dd, J 8.0, 1.7, H-C(3 or 6)); C (100.6 MHz, CDCl3) 27.4, 45.1, 74.7, 119.4, 120.0, 127.5, 128.3, 128.6, 133.7, 135.1, 145.1; max (thin film)/cm-1 3445br, 3072w, 2975w, 2929w, 1639w, 1017m; m/z (EI) 222 (2%), 199 (50), 185 (100).

(*S*)-(-)-2-(4-Chlorophenyl)-pent-4-en-2-ol (3i)2

Prepared by the allylation of
4-chloroacetophenone. Yield 94% (87% ee); H (400 MHz, CDCl3) 1.54 (3 H, s, Me), 2.05 (1 H, s, OH), 2.49 (1 H, ddt, J 13.7, 8.3, 0.8, CH2), 2.65 (1 H, ddt, J 13.7, 6.5, 1.1, CH2), 5.10-5.14 (1 H, m, =CH2), 5.15-5.18 (1 H, m, =CH2), 5.60 (1 H, dddd, J 14.8, 9.6, 8.3, 6.6, =CH), 7.31 (2 H, d, J 8.8, Ar), 7.38 (2 H, d, J 8.8, Ar); C (100.6 MHz, CDCl3) 30.3, 48.8, 73.8, 120.3, 126.8 (2 C), 128.7 (2 C), 132.8, 133.6, 146.6; max (thin film)/cm-13407br, 3076w, 2977m, 2929m, 1640m, 1489s, 1094s; m/z (EI) 181 (4%), 155 (100).

(*S*)-(-)-2-(4-Tolyl)-pent-4-en-2-ol (3j)1,5

Prepared by the allylation of
4-methylacetophenone. Yield 96% at 43 h (82% ee); H (400 MHz, CDCl3) 1.55 (3 H, s, Me), 2.04 (1 H, s, OH), 2.36 (3 H, s, Me), 2.50 (1 H, dd, J 13.7, 8.2, plus unresolved couplings to =CH2, CH2), 2.69 (1 H, dd, J 13.7, 6.4, plus unresolved couplings to =CH2, CH2), 5.11-5.13 (1 H, m, =CH2), 5.14-5.17 (1 H, m, =CH2), 5.64 (1 H, dddd, J 14.7, 10.1, 8.2, 6.4, =CH), 7.17 (2 H, d, J 8.2, Ar), 7.34 (2 H, d, J 8.2, Ar); C (100.6 MHz, CDCl3) 21.4, 30.4, 48.9, 73.9, 119.7, 125.1 (2 C), 129.3 (2 C), 134.2, 136.6, 145.1; max (thin film)/cm-1 3410br, 3074w, 2976s, 2924s, 1639m, 1514m, 1372m, 1091m; m/z (EI) 158 (12%), 143 (24), 135 (100).

2-(4-Methoxyphenyl)-pent-4-en-2-ol (3k)2

Prepared by the allylation of
4-methoxyacetophenone. Yield 62 % (29% ee); H (400 MHz, CDCl3) 1.53 (3 H, s, Me), 1.99 (1 H, s, OH), 2.48 (1 H, dd, J 13.7, 8.1, plus unresolved couplings to =CH2, CH2), 2.66 (1 H, dd, J 13.7, 6.6, plus unresolved couplings to =CH2, CH2), 3.81 (3 H, s, OMe), 5.10 (1 H, apparent s, =CH2), 5.14 (1 H, m, =CH2), 5.63 (1 H, dddd, J 14.7, 10.4, 8.1, 6.6, =CH), 6.87 (2 H, dd, J 8.8, 2.1, Ar), 7.36 (2 H, dd, J 8.8, 2.1, Ar); C (100.6 MHz, CDCl3) 29.9, 48.6, 55.3, 73.4, 113.5 (2 C), 119.3, 126.0 (2 C), 133.9, 139.9, 158.3; max (thin film)/cm-1 3447br, 3073w, 2975m, 2933m, 2835m, 1611s, 1513s, 1249s, 1179s, 1034s; m/z (EI) 192 (M+, 1%), 174 (69), 151 (100).

3-Methyl-1-phenyl-hexa-1,5-dien-3-ol (3l)1,3

Prepared by the allylation of benzylidene acetone. Yield 95% (71% ee); H (400 MHz, CDCl3) 1.38 (3 H, s, Me), 1.81 (1 H, br s, OH), 2.36 (1 H, ddt, J 13.6, 8.1, 0.8, CH2), 2.44 (1 H, ddt, J 13.6, 6.7, 1.1, CH2), 5.13-5.16 (1 H, m, =CH2), 5.17-5.18 (1 H, m, =CH2), 5.84 (1 H, dddd, J 16.4, 10.8, 8.1, 6.7, =CH), 6.29 (1 H, d, J 16.1, =CH), 6.59 (1 H, d, J 16.1, =CH), 7.22 (1 H, tt, J 7.3, 1.4, Ar), 7.28-7.33 (2 H, m, Ar), 7.36-7.39 (2 H, m, Ar); C (100.6 MHz, CDCl3) 28.1, 47.4, 72.4, 119.4, 126.5 (2 C), 127.5 (2 C), 128.6 (2 C), 133.6, 136.3, 137.0; max (thin film)/cm-1 3384br, 3076m, 3026m, 2975m, 2928m, 1640m, 1623w, 1494m, 1447m; m/z (EI) 170 (63%), 155 (65), 147 (100).

4-Methyl-oct-1-en-5-yn-4-ol (3m)5

Prepared by the allylation of 3-hexyn-2-one. Yield 97% (5% ee); H (400 MHz, CDCl3) 1.13 (3 H, t, J 7.5, Me), 1.46 (3 H, s, Me), 2.07 (1 H, br s, OH), 2.20 (2 H, q, J 7.5, CH2), 2.35 (1 H, ddt, J 13.4, 8.0, 0.9, CH2), 2.45 (1 H, ddt, J 13.4, 6.6, 1.2, CH2), 5.14-5.21 (2 H, m, =CH2), 5.57 (1 H, dddd, J 17.0, 10.3, 8.0, 6.6, =CH); C (100.6 MHz, CDCl3) 12.4, 14.0, 29.7, 48.6, 67.1, 83.0, 85.2, 119.2, 133.8; max (thin film)/cm-1 3380br, 3076m, 2978s, 2936m, 1641m, 1318m; m/z (EI) 105 (3%), 97 (100).

(*S*)-(-)-2-Cyclohexyl-pent-4-en-2-ol (3n)1,5,6

Prepared by the allylation of cyclohexyl methyl ketone. Yield 28% (41% ee); H (400 MHz, CDCl3) 1.10 (3 H, s, Me), overlapped by 0.95-1.90 (12 H, m, *c*-C6H11 and OH), 2.17-2.29 (2 H, m, CH2allyl), 4.99-5.18 (2 H, m, =CH2), 5.84-5.95 (1 H, m, =CH); C (100.6 MHz, CDCl3) 23.8, 26.6, 26.8 (2 C), 27.0, 27.7, 44.3, 47.6, 74.0, 118.7, 134.3; max (thin film)/cm-13415vbr, 2926m, 2853m, 1639w, 1450w, 1050w; m/z (EI) 150 (6%), 135 (7), 127 (100).

2-(1-Cyclohexenyl)-pent-4-en-2-ol (3o)3

Prepared by the allylation of 1-acetyl-1-cyclohexene. Yield 29% at 44 h (30% ee); H (400 MHz, CDCl3) 1.27 (3 H, s, Me), 1.53-1.60 (4 H, m, CH2CH2), 1.62 (1 H, s, OH), 1.99-2.03 (2 H, m, *CH2*CH=), 2.04-2.07 (2 H, m, *CH2*CH=), 2.23 (1 H, m, CH2allyl) 2.41 (1 H, ddt J 13.8, 6.5, 1.3, CH2allyl), 5.00-5.14 (2 H, m, =CH2), 5.65-5.76 (1 H, m, =CH); C (100.6 MHz, CDCl3) 22.4, 23.1, 24.9, 25.1, 27.1, 45.1, 74.2, 118.6, 120.2, 134.2, 142.1; max (thin film)/cm-1 3454br, 1638s.

4-Methyl-non-1-en-4-ol (3p)4

Prepared by the allylation of heptan-2-one. Yield 96% (41% ee); H (400 MHz, CDCl3) 0.90 (3 H, t, J 7.2, Me), 1.12 (3 H, s, Me), 1.29-1.43 (9 H, m, (CH2)4 and OH), 2.23 (2 H, dd, J 7.5, 1.0, plus unresolved couplings, CH2allyl), 5.09-5.16 (2 H, m, =CH2), 5.87 (1 H, ddt, J 16.9, 10.3, 7.5, =CH); C (100.6 MHz, CDCl3) 14.1, 22.7, 23.6, 26.8, 32.5, 41.9, 46.4, 72.3, 118.7, 134.2; max (thin film)/cm-1 3382br, 3076m, 2930s, 2860s, 1640m, 1462m, 1376m, 1155m; m/z (EI) 138 (7%), 115 (97), 55 (100).

2,2,3-Trimethyl-hex-5-en-3-ol (3q)8

Prepared by the allylation of pinacolone. Yield 4% (<2% ee); H (400 MHz, CDCl3) 0.97 (9 H, s, tBu), 1.12 (3 H, s, Me), 1.32 (1 H, br s, OH), 2.20 (1 H, ddt, J 13.7, 7.4, 0.9, CH2), 2.35 (1 H, dd, 13.7, 7.4, plus unresolved couplings to =CH2, CH2), 5.11 (1 H, ddt, J 17.4, 2.2, 1.3, =CH2), 5.16 (1 H, ddt, J 10.2, 2.2, 0.9, =CH2), 5.95 (1 H, ddt, J 17.4, 10.2, 7.4, =CH); C (100.6 MHz, CDCl3) 21.7, 25.3 (3 C), 37.8, 41.0, 75.8, 118.6, 135.3; max (thin film)/cm-1 3473br, 3073w, 2960m, 1637w.

**Determination of Enantiopurities of the Product Alcohols**

Enantiomeric excess determinations for the product alcohols **3** were made by GC or HPLC as described in Table 5.

**Table 5.** Details of Enantiomeric assays of *tert*-alcohols-**3**a

| **3** | Column | Conditions | Rtn. Times/min |
| --- | --- | --- | --- |
| **3a** | 6-Me-2,3-pe--CD | 100 oC isothermal | 21.7 (*R*)  23.0 (*S*) |
| **3b** | 6-Me-2,3-pe--CD | 90 oC initial, 2 deg min-1 to 100 oC | 30.7b  31.8 |
| **3c** |  | 97:3 hexane:PriOH; flow rate 0.5 m min-1 | 18.4 (*R*)  22.5 (*S*) |
| **3d** | Chiralcel OD | 100:0-98:2 hexane:PriOH over 35 mins; flow rate 0.5 mL min-1 | 52.8 (*S*)  60.4 (*R*) |
| **3e** | Chiralcel AD | 95:5 hexane:PriOH; flow rate 0.5 m min-1 | 26.3 (*S*)  29.7 (*R*) |
| **3f** | 6-Me-2,3-pe--CD | 90 oC initial, 4 deg min-1 to 125 oC | 45.6 (*R*)  46.9 (*S*) |
| **3g** | Cyclodex-B | 120 oC isothermal | 145.0 (*S*)  149.8 (*R*) |
| **3h** | 6-Me-2,3-pe--CD | 55 oC initial for 5 min, 2 deg min-1 to 105 oC | 76.3b  78.3 |
| **3i** | 6-Me-2,3-pe--CD | 90 oC initial, 3 deg min-1 to 120 oC | 35.0 (*R*)  36.3 (*S*) |
| **3j** | 6-Me-2,3-pe--CD | 90 oC initial for 5 min, 3 deg min-1 to 110 oC | 28.5 (*R*)  29.6 (*S*) |
| **3k** | Chiralcel OD | 100:0-98:2 hexane:PriOH over 35 mins; flow rate 0.5 mL min-1 | 42.2 (*R*)  44.4 (*S*) |
| **3l** | 2,6-Me-3-pe--CD | 70 oC initial for 25 min, 1 deg min-1 to 120 oC | 94.0b  97.0 |
| **3m** | 6-diMe-3-pe--CD | 70 oC isothermal | 16.1  16.9 |
| **3n** | 6-Me-2,3-pe--CD | 75 oC initial for 5 min, 2.5 deg min-1 to 100 oC | 26.0 (*R*)  26.5 (*S*) |
| **3o** | Cyclodex-B | 70 oC initial for 20 min, 2 deg min-1 to 100 oC | 88.2b  90.7 |
| **3q** | Cyclodex-B | 75 oC initial for 5 min, 1 deg min-1 to 85 oC | 23.6  24.8 |
| **3p** | 6-Me-2,3-pe--CD | 60 oC isothermal | 55.0b  57.5 |

*a* Chiral GC analyses conducted on either *octakis*-(6-*O*-methyl-2,3-di-*O*-pentyl)--cyclodextrin [6-Me-2,3-pe--CD], *octakis*-(2,6-di-*O*-methyl-3-*O*-pentyl)--cyclodextrin [6-diMe-3-pe--CD] or Cyclodex-B columns with head pressures of 12 psi. Chiral HPLC conducted on Chiralcel OD or AD columns UV detection at 210 or 280 nm.

b Sense of optical induction not determined.

References

1 S. Casolari, D. D’Addario and E. Tagliavini, *Org. Lett.*, 1999, **1**, 1061.

2 S. Kii and K. Maruoka, Chirality, 2003, **15**, 68; (b) H. Hanawa, S. Kii and K. Maruoka, *Adv. Synth. Catal.*, 2001, **343**, 57.

3 K. M. Waltz, J. Gavenonis, and P. J. Walsh, *Angew. Chem. Int. Ed.*, 2002, **41**, 3697.

4 S. Yamasaki, K. Fujii, R. Wada, M. Kanai, and M. Shibasaki, *J. Am. Chem. Soc.*, 2002, **124**, 6536.

5 (a) R. Hamaasaki, Y. Chounan, H. Horino and Y. Yamamoto, Tetrahedron Lett., 2000, **41**, 50, 9883; (b) R. Kamble and V. Singh, Tetrahedron Lett., 2001, **42**, 42, 7525.

6 A. Cunningham and S. Woodward, *Synlett*, 2002, 43.

7 J. Macleod and L. Monahan, Tetrahedron Lett., 1988, **29,** 3, 391.

8 G. W. Kramer and H. C. Brown, *J. Org. Chem.*, 1977, **42**, 2292.
